# Supplementary material for: Identification of diborane(4) with bridging B–H–B bonds
Source: Royal Society of Chemistry journal article supplement (doi:10.1039/c5sc02586a), 2015-01-01
Supplement: c5sc02586a1.pdf [file c5sc02586a1.pdf]

## Supplementary Information

### Identification of Diborane(4) with Bridging B-H-B Bonds

Sheng-Lung Chou,<sup>1</sup> Jen-Iu Lo,<sup>1</sup> Yu-Chain Peng,<sup>1</sup> Meng-Yeh Lin,<sup>1</sup> Hsiao-Chi Lu,<sup>1</sup>

Bing-Ming Cheng<sup>1\*</sup> and J. F. Ogilvie<sup>2</sup>

<sup>1</sup>*National Synchrotron Radiation Research Center, 101 Hsin-Ann  
Road, Hsinchu Science Park, Hsinchu 30076, Taiwan*

<sup>2</sup>*Escuela de Química y CELEQ, Universidad de Costa Rica, Ciudad Universitaria  
Rodrigo Facio, San Pedro de Montes de Oca, San Jose 11501-2060, Costa Rica*

\*To whom correspondence should be addressed. e-mail: [bmcheng@nsrrc.org.tw](mailto:bmcheng@nsrrc.org.tw)

This supplementary information describes ultraviolet absorption of B<sub>2</sub>H<sub>6</sub> dispersed in solid neon in section 1, infrared absorption lines recorded after photolysis of B<sub>2</sub>H<sub>6</sub>/Ne=1/1000 or B<sub>2</sub>D<sub>6</sub>/Ne=1/1000 at 122.6 nm in section 2, the emission spectrum from B<sub>2</sub>H<sub>6</sub>/Ne=1/1000 irradiated with 122.6 nm at 3 K in section 3, the UV absorption spectrum of B<sub>2</sub> from B<sub>2</sub>H<sub>6</sub>/Ne=1/1000 irradiated with 122.6 nm at 3 K in section 4, the temporal profiles of photolysis of B<sub>2</sub>H<sub>6</sub>/Ne=1/1000 upon 122.6 nm at 3 K in section 5, the calculated structures, enthalpies of formation, vibrational wavenumbers and intensities for various species B<sub>2</sub>H<sub>n</sub> in section 6, wavenumber/cm<sup>-1</sup> and intensity/km mol<sup>-1</sup> of calculated fundamental vibrational modes for various isotopic B<sub>2</sub>H<sub>4</sub><sup>+</sup> (C<sub>2v</sub>) and B<sub>2</sub>D<sub>4</sub><sup>+</sup> (C<sub>2v</sub>) in section 7, and wavenumber/cm<sup>-1</sup> and intensity/km mol<sup>-1</sup> of calculated fundamental vibrational modes and NIST data for <sup>11</sup>B<sub>2</sub>H<sub>6</sub> in section 8.

## 1. Ultraviolet absorption of B<sub>2</sub>H<sub>6</sub> dispersed in solid neon

In this work, we irradiated samples of B<sub>2</sub>H<sub>6</sub> dispersed in solid neon with tunable ultraviolet light selected from a synchrotron source. For photolytic dissociation, it is important to know the form and the extent of the absorption of precursor molecules involved in the radiative excitation. For this purpose, a gaseous mixture of B<sub>2</sub>H<sub>6</sub> with neon in proportion 1:1000 was deposited (flow rate 0.17 sccs, period 1 h) on a LiF crystal maintained at 3 K with a refrigerator system (Janis RDK-415); we subsequently measured the absorption spectrum with a double-beam apparatus coupled to beamline BL03 at National Synchrotron Radiation Research Center.<sup>1,2</sup> Figure S1 shows the far UV absorption spectrum of diborane(6) dispersed in neon with molar ratio 1/1000 at 3 K in the spectral region between 115 nm and 220 nm at spectral resolution 0.2 nm; the thickness of the deposited sample was about 8-10 μm. An inspection of the total absorption profile reveals that the absorption of diborane(6) dispersed in neon contains three sections, a threshold region begins 205 to 169 nm, a weak absorption region from 169 to 135 nm, and a dominant absorption in region 135-115 nm with maximum at 122.6 nm. A detailed assignment of the transitions will be reported elsewhere.<sup>3</sup>

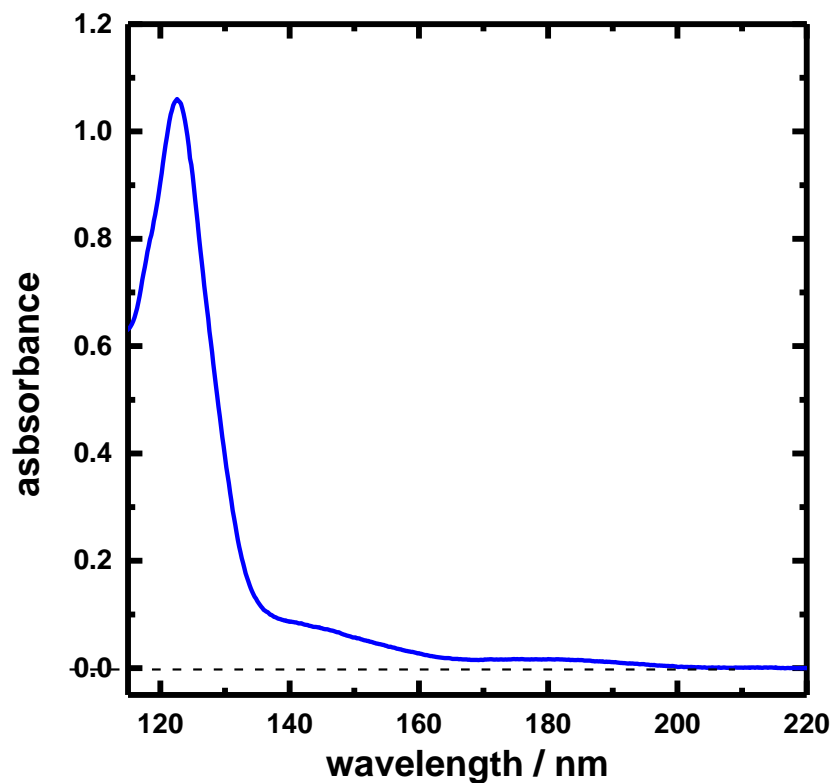

**Figure S1.** Absorption spectrum (resolution 0.2 nm, step 0.2 nm) of B<sub>2</sub>H<sub>6</sub> dispersed in neon (1/1000) at 3 K in wavelength range 115-220 nm.

### References

1. H.-C. Lu, H.-K. Chen, B.-M. Cheng, Y.-P. Kuo, J. F. Ogilvie, *J. Phys. B: At. Mol. Opt. Phys.* **38**, 3693 (2005)
2. H.-C. Lu, H.-K. Chen, B.-M. Cheng, J. F. Ogilvie, *Spectrochim. Acta B Mol. Biomol. Spectrosc.* **71**, 1485 (2008).
3. Y.-C. Peng, S.-L. Chou, J.-I. Lo, M.-Y. Lin, H.-C. Lu, B.-M. Cheng, J. F. Ogilvie, *to be submitted* (2015).

2. Infrared absorption lines recorded after photolysis of B<sub>2</sub>H<sub>6</sub>/Ne=1/1000 or B<sub>2</sub>D<sub>6</sub>/Ne=1/1000 at 122.6 nm

**Table S1** Infrared absorption lines recorded after photolysis of B<sub>2</sub>H<sub>6</sub>/Ne=1/1000 or B<sub>2</sub>D<sub>6</sub>/Ne=1/1000 at 122.6 nm

| wavenumber/cm <sup>-1</sup>                                                                                                |                                                                                                         | species                       | Ref. |
|----------------------------------------------------------------------------------------------------------------------------|---------------------------------------------------------------------------------------------------------|-------------------------------|------|
| B <sub>2</sub> H <sub>6</sub>                                                                                              | B <sub>2</sub> D <sub>6</sub>                                                                           |                               |      |
| 2264.5, 2279.7                                                                                                             | 1688.5                                                                                                  | BH                            | 1    |
| 1141.2, 1152.3                                                                                                             | 889.9, 904.9                                                                                            | BH <sub>3</sub>               | 1,2  |
| 2686.1, 2693.1                                                                                                             | -                                                                                                       | B <sub>2</sub> H <sub>2</sub> | 1    |
| 540.2, 545.2, 550.5, 719.1,<br>720.9, 1278.1, 1279.1, 1281.2,<br>1318.6, 1343.0, 1992.6, 1999.9,<br>2696.0, 2700.4, 2708.3 | 457.3, 463.4, 523.8, 524.8,<br>921.6, 923.6, 926.7, 1415.3,<br>1417.9, 1477.5, 1481.3                   | B <sub>2</sub> H <sub>4</sub> |      |
| 536.9, 715.4, 742.5, 783.8,<br>835.3, 1067.4, 1209.2, 1266.8,<br>1294.0, 1308.2, 2315.2,<br>2321.7, 2391.3, 3783.4         | 592.8, 624.3, 791.2, 804.1,<br>807.1, 820.3, 823.2,<br>884.4, 1631.4, 1793.8,<br>1797.1, 1800.1, 1802.9 | unidentified                  |      |

**References**

1. T. J. Tague, L. Andrews, *J. Am. Chem. Soc.* **116**, 4970-4976 (1994).
2. L. Andrews, X. Wang, *J. Am. Chem. Soc.* **124**, 7280-7281 (2002).

3. Emission spectrum from  $B_2H_6/Ne=1/1000$  at 3 K irradiated with 122.6 nm

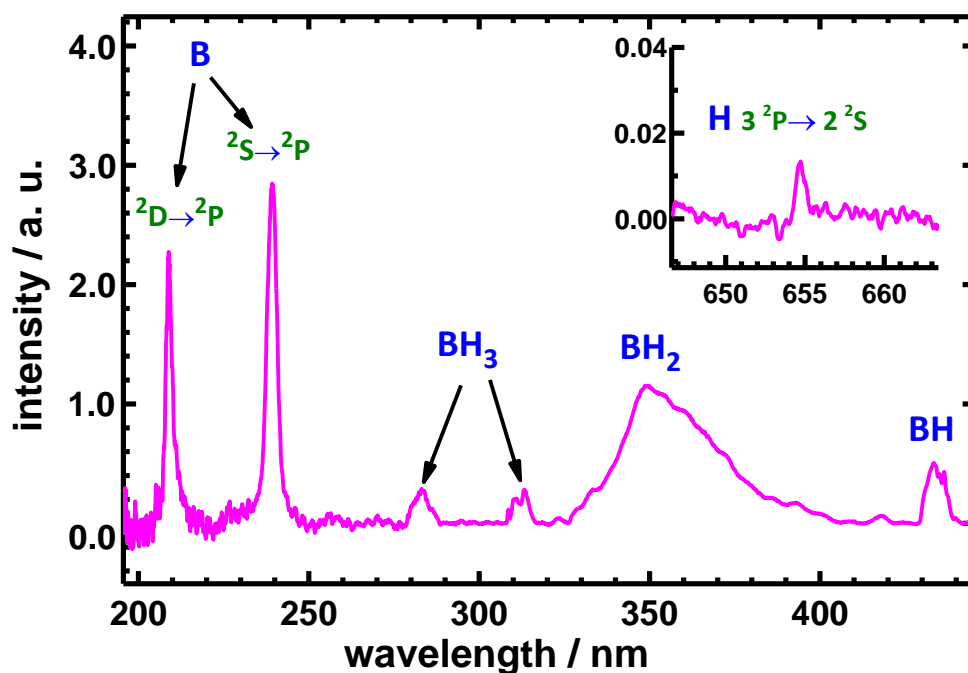

**Figure S2.** Emission spectrum after photolysis of  $B_2H_6/Ne=1/1000$  at 3 K irradiated at 122.6 nm. Emission lines of products H,<sup>1-3</sup> B,<sup>4</sup> BH,<sup>5,6</sup> BH<sub>2</sub>,<sup>7</sup> and BH<sub>3</sub> are identified and marked.

### References

1. S. A. Mitchell, *Astrophys. J.* **105**, 1 (1947).
2. T. W. Hänsch, M. H. Nayfeh, S. A. Lee, S. M. Curry, I. S. Shahin, *Phys. Rev. Lett.* **32**, 1336–1340 (1974).
3. P. Zhao, W. Lichten, H. P. Layer, J. C. Bergquist, *Phys. Rev. A*, **34**, 5138–5141 (1986).
4. “NIST Atomic Spectra Database,” *NIST Atomic Spectra Database*. [Online]. Available: <http://www.nist.gov/pml/data/asd.cfm>.
5. J. W. C. Johns, F. A. Grimm, R. F. Porter, *J. Mol. Spectr.* **22**, 435–451 (1967).
6. W. T. M. L. Fernando, P. F. Bernath, *J. Mol. Spectr.* **145**, 392–402 (1991).
7. J. A. Harrison, R. F. Meads, L. F. Phillips, *Chem. Phys. Lett.* **148**, 125–129 (1988).

4. UV absorption spectrum of  $B_2$  from  $B_2H_6/Ne=1/1000$  at 3 K irradiated at 122.6 nm

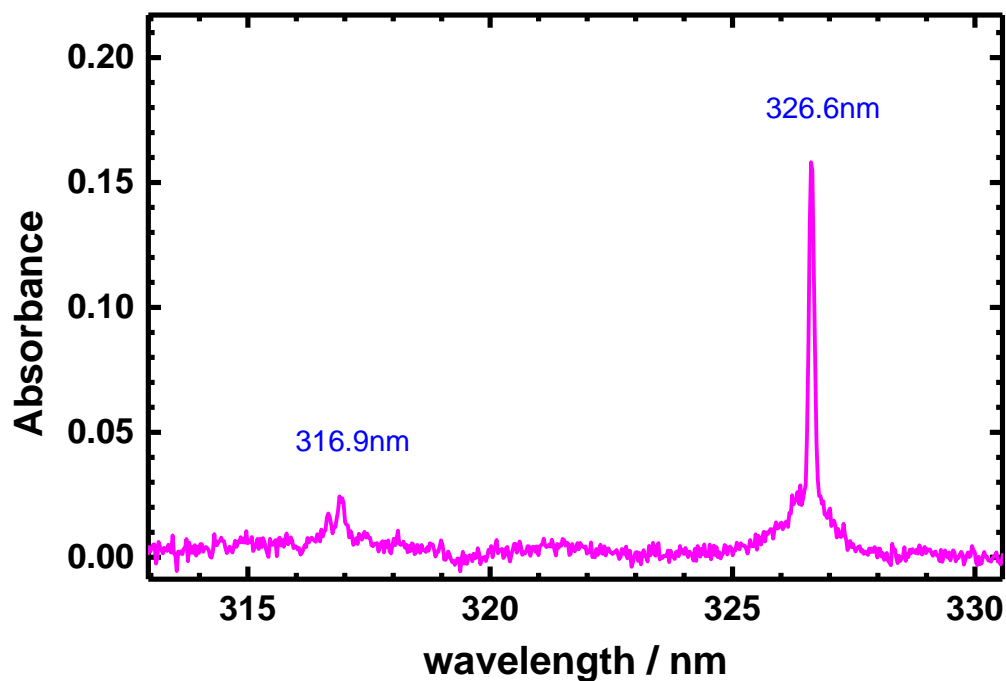

**Figure S3.** UV absorption spectrum of  $B_2$  from photolysis of  $B_2H_6/Ne=1/1000$  at 3 K at 122.6 nm. Absorption lines at 326.6 and 316.9 nm of  $B_2$  correspond to transitions from  $X \rightarrow A(0,0)$  and  $A(0,1)$ ,<sup>1,2</sup> respectively.

#### References

1. R. W. Nicholls, P. A. Fraser, W. R. Jarman, *Combustion and Flame* **3**, 13–38 (1959).
2. “NIST Chemistry WebBook,” *NIST Chemistry WebBook*: <http://webbook.nist.gov/chemistry/>.

5. Temporal profiles of photolysis at 122.6 nm of  $B_2H_6/Ne=1/1000$  at 3 K

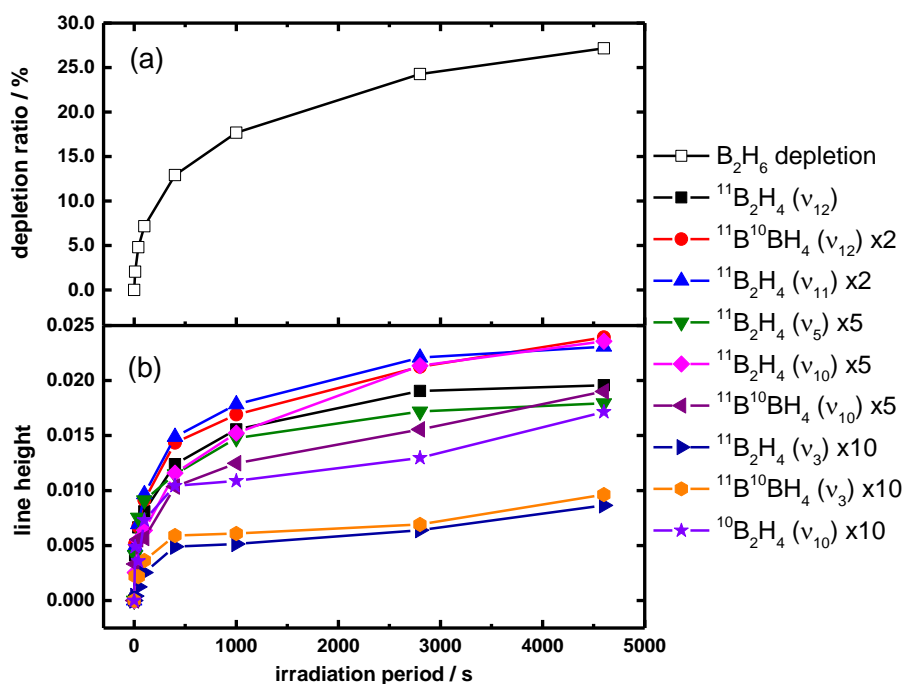

**Figure S4.** For  $B_2H_6/Ne=1/1000$  at 3 K irradiated at 122.6 nm, (a) temporal profile of depletion ratio for  $B_2H_6$ ; (b) temporal profiles of formation of lines attributed to  $B_2H_4$  in various vibrational modes.

**6. Calculated structures, enthalpies of formation, vibrational wavenumbers and intensities for various species  $B_2H_n$**

6(a)  $B_2H$  ( $C_{\infty v}$ ),  $\Delta H_f = 882.5 \text{ kJ mol}^{-1}$

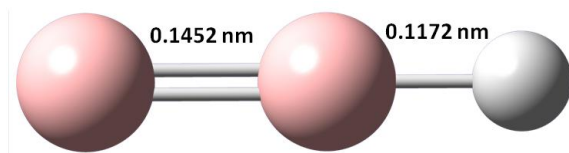

|                      | $^{11}B_2H$                              | $^{10}B^{11}BH$                          | $^{11}B^{10}BH$                          | $^{11}B_2D$                              |
|----------------------|------------------------------------------|------------------------------------------|------------------------------------------|------------------------------------------|
| mode<br>(symmetry)   | $\nu/\text{cm}^{-1}$ (int.) <sup>a</sup> | $\nu/\text{cm}^{-1}$ (int.) <sup>a</sup> | $\nu/\text{cm}^{-1}$ (int.) <sup>a</sup> | $\nu/\text{cm}^{-1}$ (int.) <sup>a</sup> |
| $\nu_1$ ( $\Sigma$ ) | 2712.0 (0.8)                             | 2712.3 (0.9)                             | 2727.2 (1.2)                             | 2044.5 (5.7)                             |
| $\nu_2$ ( $\Sigma$ ) | 1316.8 (39.3)                            | 1350.4 (41.3)                            | 1343.0 (40.8)                            | 1262.2 (34.1)                            |
| $\nu_3$ ( $\Pi$ )    | 705.0 (181.1)                            | 706.5 (182.9)                            | 712.6 (186.9)                            | 559.9 (129.2)                            |

<sup>a</sup>Enthalpy of formation and vibrational wavenumbers, scaled by 0.967, calculated with program Gaussian 09, B3LYP method and basis set 6-311++G\*\* (B3LYP/6-311++G\*\*); calculated intensities have unit  $\text{km mol}^{-1}$ .



6(b)  $\text{B}_2\text{H}_2$  ( $D_{\infty h}$ ),  $\Delta H_f = 512.9 \text{ kJ mol}^{-1}$

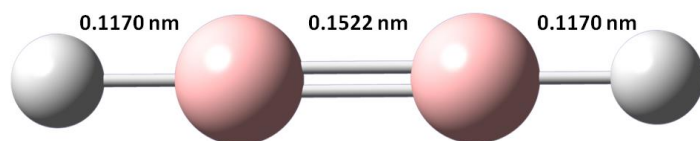

|                    | $^{11}\text{B}_2\text{H}_2$                | $^{10}\text{B}^{11}\text{BH}_2$            | $^{11}\text{B}_2\text{D}_2$                |
|--------------------|--------------------------------------------|--------------------------------------------|--------------------------------------------|
| mode (symmetry)    | $\nu / \text{cm}^{-1}$ (int.) <sup>a</sup> | $\nu / \text{cm}^{-1}$ (int.) <sup>a</sup> | $\nu / \text{cm}^{-1}$ (int.) <sup>a</sup> |
| $\nu_1 (\Sigma_g)$ | 2747.2 (0.0)                               | 2758.3 (0.6)                               | 2091.6 (0.0)                               |
| $\nu_2 (\Sigma_g)$ | 1194.0 (0.0)                               | 1219.4 (0.0)                               | 1109.8 (0.0)                               |
| $\nu_3 (\Sigma_u)$ | 2710.1 (19.8)                              | 2715.2 (19.2)                              | 1996.3 (10.7)                              |
| $\nu_4 (\Pi_g)$    | 392.3 (0.0)                                | 403.1 (0.0)                                | 330.9 (0.0)                                |
| $\nu_5 (\Pi_u)$    | 568.3 (45.7)                               | 573.1 (46.1)                               | 421.2 (24.9)                               |

<sup>a</sup>Enthalpy of formation and vibrational wavenumbers, scaled by 0.967, calculated with program Gaussian 09, B3LYP method and basis set 6-311++G\*\* (B3LYP/6-311++G\*\*); calculated intensities have unit  $\text{km mol}^{-1}$ .

6(c)  $B_2H_3$  ( $C_{2v}$ ),  $\Delta H_f = 327.0 \text{ kJ mol}^{-1}$

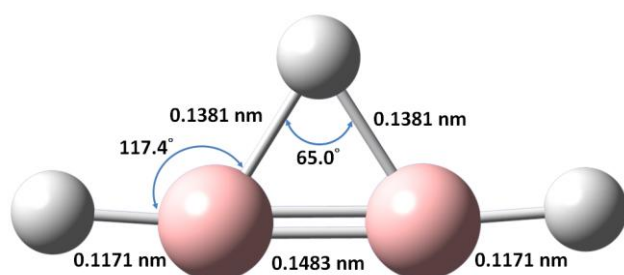

|                    | $^{11}B_2H_3$                                 | $^{10}B^{11}BH_3$                             | $^{11}B_2D_3$                                 |
|--------------------|-----------------------------------------------|-----------------------------------------------|-----------------------------------------------|
| mode<br>(symmetry) | $\nu / \text{cm}^{-1}$<br>(int.) <sup>a</sup> | $\nu / \text{cm}^{-1}$<br>(int.) <sup>a</sup> | $\nu / \text{cm}^{-1}$<br>(int.) <sup>a</sup> |
| $\nu_1$ ( $A_1$ )  | 2738.8 ( 0.0 )                                | 2749.5 ( 1.0 )                                | 2095.9 ( 0.1 )                                |
| $\nu_2$ ( $A_1$ )  | 1865.2 ( 102.6 )                              | 1867.9 ( 102.9 )                              | 1357 ( 53.9 )                                 |
| $\nu_3$ ( $A_1$ )  | 1270.4 ( 0.6 )                                | 1297 ( 0.7 )                                  | 1173.2 ( 0.2 )                                |
| $\nu_4$ ( $A_1$ )  | 751.5 ( 0.9 )                                 | 752.7 ( 0.9 )                                 | 547.6 ( 0.6 )                                 |
| $\nu_5$ ( $A_2$ )  | 582.4 ( 0.0 )                                 | 585.2 ( 0.3 )                                 | 483.6 ( 0.0 )                                 |
| $\nu_6$ ( $B_1$ )  | 586.3 ( 0.5 )                                 | 590.0 ( 0.2 )                                 | 429.0 ( 0.1 )                                 |
| $\nu_7$ ( $B_2$ )  | 2700.4 ( 30.0 )                               | 2704.9 ( 29.5 )                               | 1989.3 ( 19.6 )                               |
| $\nu_8$ ( $B_2$ )  | 1132.9 ( 80.8 )                               | 1133.7 ( 80.4 )                               | 813.1 ( 37.2 )                                |
| $\nu_9$ ( $B_2$ )  | 458.0 ( 49.1 )                                | 462.7 ( 50.5 )                                | 385.5 ( 39.1 )                                |

<sup>a</sup>Enthalpy of formation and vibrational wavenumbers, scaled by 0.967, calculated with program Gaussian 09, B3LYP method and basis set 6-311++G\*\* (B3LYP/6-311++G\*\*); calculated intensities have unit  $\text{km mol}^{-1}$ .

6(d)  $\text{B}_2\text{H}_3$  ( $\text{C}_{2v}$ ),  $\Delta H_f = 324.0 \text{ kJ mol}^{-1}$

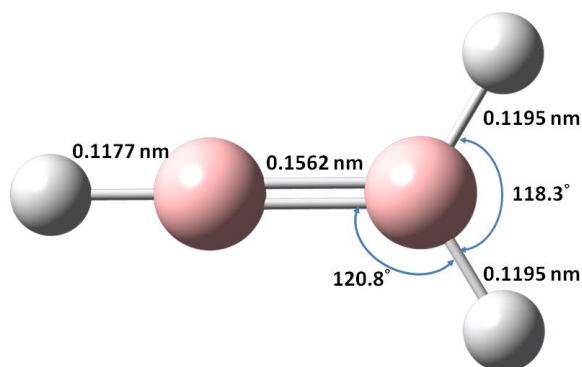

|                          | $^{11}\text{B}_2\text{H}_3$ | $^{10}\text{B}^{11}\text{BH}_3$ | $^{11}\text{B}^{10}\text{BH}_3$ | $^{11}\text{B}_2\text{D}_3$ |
|--------------------------|-----------------------------|---------------------------------|---------------------------------|-----------------------------|
| mode                     | $\nu / \text{cm}^{-1}$      | $\nu / \text{cm}^{-1}$          | $\nu / \text{cm}^{-1}$          | $\nu / \text{cm}^{-1}$      |
| (symmetry)               | (int.) <sup>a</sup>         | (int.) <sup>a</sup>             | (int.) <sup>a</sup>             | (int.) <sup>a</sup>         |
| $\nu_1$ ( $\text{A}_1$ ) | 2684.2 ( 25.7 )             | 2697.9 ( 26.2 )                 | 2684.5 ( 25.4 )                 | 2005.3 ( 13.9 )             |
| $\nu_2$ ( $\text{A}_1$ ) | 2470.8 ( 19.2 )             | 2470.8 ( 19.2 )                 | 2477.2 ( 19.3 )                 | 1796.6 ( 10.6 )             |
| $\nu_3$ ( $\text{A}_1$ ) | 1116.2 ( 1.1 )              | 1124.8 ( 1.1 )                  | 1138.4 ( 1.2 )                  | 1016.3 ( 1.0 )              |
| $\nu_4$ ( $\text{A}_1$ ) | 973.9 ( 0.1 )               | 988 ( 0.1 )                     | 978.5 ( 0.1 )                   | 737.8 ( 0.0 )               |
| $\nu_5$ ( $\text{B}_1$ ) | 760.8 ( 5.4 )               | 761.7 ( 5.5 )                   | 770.6 ( 5.4 )                   | 612.1 ( 2.6 )               |
| $\nu_6$ ( $\text{B}_1$ ) | 514.1 ( 2.7 )               | 518.9 ( 2.5 )                   | 514.3 ( 2.6 )                   | 395.2 ( 0.6 )               |
| $\nu_7$ ( $\text{B}_2$ ) | 2527.9 ( 50.9 )             | 2527.9 ( 51 )                   | 2541.6 ( 50.3 )                 | 1884.3 ( 22.5 )             |
| $\nu_8$ ( $\text{B}_2$ ) | 867.6 ( 18.1 )              | 878.2 ( 18.9 )                  | 871.7 ( 18.6 )                  | 708.7 ( 16.3 )              |
| $\nu_9$ ( $\text{B}_2$ ) | 309.2 ( 0.1 )               | 309.2 ( 0.1 )                   | 310.5 ( 0.1 )                   | 226.8 ( 0.1 )               |

<sup>a</sup>Enthalpy of formation and vibrational wavenumbers, scaled by 0.967, calculated with program Gaussian 09, B3LYP method and basis set 6-311++G\*\* (B3LYP/6-311++G\*\*); calculated intensities have unit  $\text{km mol}^{-1}$ .

6(e)  $\text{B}_2\text{H}_4$  ( $\text{C}_{2v}$ ),  $\Delta H_f = 206.8 \text{ kJ mol}^{-1}$

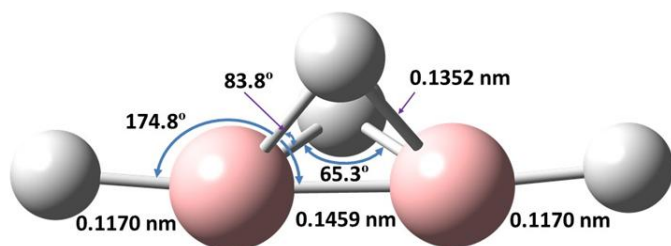

|                             | $^{11}\text{B}_2\text{H}_4$                   | $^{10}\text{B}^{11}\text{BH}_4$               | $^{11}\text{B}_2\text{D}_4$                   |
|-----------------------------|-----------------------------------------------|-----------------------------------------------|-----------------------------------------------|
| mode<br>(symmetry)          | $\nu / \text{cm}^{-1}$<br>(int.) <sup>a</sup> | $\nu / \text{cm}^{-1}$<br>(int.) <sup>a</sup> | $\nu / \text{cm}^{-1}$<br>(int.) <sup>a</sup> |
| $\nu_1$ ( $\text{A}_1$ )    | 2739.1 (0.01)                                 | 2750.2 (1.26)                                 | 2103.4 (0.34)                                 |
| $\nu_2$ ( $\text{A}_1$ )    | 2001.1 (25.02)                                | 2002.1 (25.05)                                | 1429.7 (12.88)                                |
| $\nu_3$ ( $\text{A}_1$ )    | 1317.8 (2.85)                                 | 1345.4 (5.40)                                 | 1210.1 (1.60)                                 |
| $\nu_4$ ( $\text{A}_1$ )    | 1089.3 (0.66)                                 | 1091.8 (0.68)                                 | 801.6 (0.20)                                  |
| $\nu_5$ ( $\text{A}_1$ )    | 710.1 (5.03)                                  | 711.2 (5.09)                                  | 515.3 (2.83)                                  |
| $\nu_6$ ( $\text{A}_2$ )    | 1195.9 (0.00)                                 | 1195.9 (0.00)                                 | 845.9 (0.00)                                  |
| $\nu_7$ ( $\text{A}_2$ )    | 619.7 (0.00)                                  | 626.3 (0.00)                                  | 524.3 (0.00)                                  |
| $\nu_8$ ( $\text{B}_1$ )    | 2002.6 (55.02)                                | 2005.9 (55.14)                                | 1463.8 (28.68)                                |
| $\nu_9$ ( $\text{B}_1$ )    | 773.7 (1.40)                                  | 774.7 (1.37)                                  | 560.8 (0.49)                                  |
| $\nu_{10}$ ( $\text{B}_2$ ) | 2700.5 (35.19)                                | 2705.0 (34.86)                                | 1991.3 (27.29)                                |
| $\nu_{11}$ ( $\text{B}_2$ ) | 1279.6 (189.35)                               | 1280.7 (187.67)                               | 929.8 (103.08)                                |
| $\nu_{12}$ ( $\text{B}_2$ ) | 532.3 (43.80)                                 | 537.6 (45.03)                                 | 447.3 (34.21)                                 |

<sup>a</sup>Enthalpy of formation and vibrational wavenumbers, scaled by 0.967, calculated with program Gaussian 09, B3LYP method and basis set 6-311++G\*\* (B3LYP/6-311++G\*\*); calculated intensities have unit  $\text{km mol}^{-1}$ .

6(f)  $\text{B}_2\text{H}_4$  ( $D_{2d}$ ),  $\Delta H_f = 219.8 \text{ kJ mol}^{-1}$

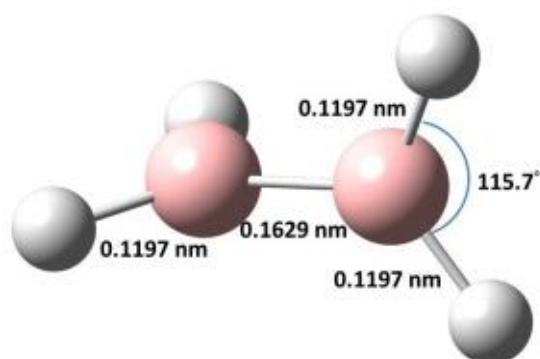

| $^{11}\text{B}_2\text{H}_4$ ( $D_{2d}$ ) |                        | $^{10}\text{B}_2\text{H}_4$ ( $D_{2d}$ ) |                        | $^{11}\text{B}^{10}\text{BH}_4$ ( $C_{2v}$ ) |                        |
|------------------------------------------|------------------------|------------------------------------------|------------------------|----------------------------------------------|------------------------|
| mode                                     | $\nu / \text{cm}^{-1}$ | mode                                     | $\nu / \text{cm}^{-1}$ | mode                                         | $\nu / \text{cm}^{-1}$ |
| (symmetry)                               | (int.) <sup>a</sup>    | (symmetry)                               | (int.) <sup>a</sup>    | (symmetry)                                   | (int.) <sup>a</sup>    |
| $\nu_1$ ( $A_1$ )                        | 2478.4 (0)             | $\nu_1$ ( $A_1$ )                        | 2486.0 (0)             | $\nu_1$ ( $A_1$ )                            | 2482.7(1.5)            |
| $\nu_2$ ( $A_1$ )                        | 1153.6 (0)             | $\nu_2$ ( $A_1$ )                        | 1172.2 (0)             | $\nu_2$ ( $A_1$ )                            | 2460.6(62.3)           |
| $\nu_3$ ( $A_1$ )                        | 838.5 (0)              | $\nu_3$ ( $A_1$ )                        | 862.4 (0)              | $\nu_3$ ( $A_1$ )                            | 1163.0(0)              |
| $\nu_4$ ( $B_1$ )                        | 545.1 (0)              | $\nu_4$ ( $B_1$ )                        | 545.2 (0)              | $\nu_4$ ( $A_1$ )                            | 1096.2 (1.9)           |
| $\nu_5$ ( $B_2$ )                        | 2458.2 (63.6)          | $\nu_5$ ( $B_2$ )                        | 2463.9 (64.0)          | $\nu_5$ ( $A_1$ )                            | 850.6 (0)              |
| $\nu_6$ ( $B_2$ )                        | 1093.7 (1.9)           | $\nu_6$ ( $B_2$ )                        | 1099.5 (1.9)           | $\nu_6$ ( $A_2$ )                            | 545.1 (0)              |
| $\nu_7$ ( $E$ )                          | 2519.4 (171.6)         | $\nu_7$ ( $E$ )                          | 2533.0(172.0)          | $\nu_7$ ( $B_1$ )                            | 2519.7 (85.6)          |
| $\nu_8$ ( $E$ )                          | 958.7 (50.3)           | $\nu_8$ ( $E$ )                          | 975.0 (51.9)           | $\nu_8$ ( $B_1$ )                            | 972.2 (25.8)           |
| $\nu_9$ ( $E$ )                          | 375.8 (6.3)            | $\nu_9$ ( $E$ )                          | 377.8 (6.4)            | $\nu_9$ ( $B_1$ )                            | 375.6 (3.1)            |
|                                          |                        |                                          |                        | $\nu_{10}$ ( $B_2$ )                         | 2533.1 (86.0)          |
|                                          |                        |                                          |                        | $\nu_{11}$ ( $B_2$ )                         | 961.4 (25.2)           |
|                                          |                        |                                          |                        | $\nu_{12}$ ( $B_2$ )                         | 377.8 (3.2)            |

<sup>a</sup>Enthalpy of formation and vibrational wavenumbers, scaled by 0.967, calculated with program Gaussian 09, B3LYP method and basis set 6-311++G\*\* (B3LYP/6-311++G\*\*); calculated intensities have unit  $\text{km mol}^{-1}$ .

| $^{11}\text{B}_2\text{D}_4 (\text{D}_{2d})$ |                                               | $^{10}\text{B}_2\text{D}_4 (\text{D}_{2d})$ |                                               | $^{11}\text{B}^{10}\text{BD}_4 (\text{C}_{2v})$ |                                               |
|---------------------------------------------|-----------------------------------------------|---------------------------------------------|-----------------------------------------------|-------------------------------------------------|-----------------------------------------------|
| mode<br>(symmetry)                          | $\nu / \text{cm}^{-1}$<br>(int.) <sup>a</sup> | mode<br>(symmetry)                          | $\nu / \text{cm}^{-1}$<br>(int.) <sup>a</sup> | mode<br>(symmetry)                              | $\nu / \text{cm}^{-1}$<br>(int.) <sup>a</sup> |
| $\nu_1 (\text{A}_1)$                        | 1821.0 (0)                                    | $\nu_1 (\text{A}_1)$                        | 1829.4 (0)                                    | $\nu_1 (\text{A}_1)$                            | 1822.8 (0.7)                                  |
| $\nu_2 (\text{A}_1)$                        | 979.9 (0)                                     | $\nu_2 (\text{A}_1)$                        | 1007.1 (0)                                    | $\nu_2 (\text{A}_1)$                            | 1783.2 (33.8)                                 |
| $\nu_3 (\text{A}_1)$                        | 679.9 (0)                                     | $\nu_3 (\text{A}_1)$                        | 682.8 (0)                                     | $\nu_3 (\text{A}_1)$                            | 991.6 (0)                                     |
| $\nu_4 (\text{B}_1)$                        | 387.2 (0)                                     | $\nu_4 (\text{B}_1)$                        | 385.6 (0)                                     | $\nu_4 (\text{A}_1)$                            | 815.3 (0.8)                                   |
| $\nu_5 (\text{B}_2)$                        | 1787.5 (32.6)                                 | $\nu_5 (\text{B}_2)$                        | 1788.1 (34.8)                                 | $\nu_5 (\text{A}_1)$                            | 680.0 (0)                                     |
| $\nu_6 (\text{B}_2)$                        | 816.9 (1.0)                                   | $\nu_6 (\text{B}_2)$                        | 819.1 (0.8)                                   | $\nu_6 (\text{A}_2)$                            | 385.6 (0)                                     |
| $\nu_7 (\text{E})$                          | 1883.4 (84.5)                                 | $\nu_7 (\text{E})$                          | 1894.6 (91.0)                                 | $\nu_7 (\text{B}_1)$                            | 1876.4 (45.1)                                 |
| $\nu_8 (\text{E})$                          | 787.1 (33.3)                                  | $\nu_8 (\text{E})$                          | 804.1 (35.2)                                  | $\nu_8 (\text{B}_1)$                            | 801.4 (17.5)                                  |
| $\nu_9 (\text{E})$                          | 282.1 (4.4)                                   | $\nu_9 (\text{E})$                          | 281.4 (3.7)                                   | $\nu_9 (\text{B}_1)$                            | 279.1 (1.8)                                   |
|                                             |                                               |                                             |                                               | $\nu_{10} (\text{B}_2)$                         | 1894.8 (45.5)                                 |
|                                             |                                               |                                             |                                               | $\nu_{11} (\text{B}_2)$                         | 787.6 (16.9)                                  |
|                                             |                                               |                                             |                                               | $\nu_{12} (\text{B}_2)$                         | 281.2 (1.8)                                   |

<sup>a</sup>Enthalpy of formation and vibrational wavenumbers, scaled by 0.967, calculated with program Gaussian 09, B3LYP method and basis set 6-311++G\*\* (B3LYP/6-311++G\*\*); calculated intensities have unit  $\text{km mol}^{-1}$ .

6(g)  $B_2H_5$  ( $C_{2v}$ ),  $\Delta H_f = 232.9 \text{ kJ mol}^{-1}$

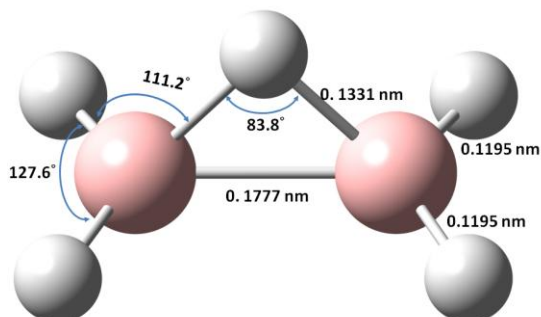

|                      | $^{11}B_2H_5$                              | $^{10}B^{11}BH_5$                          | $^{11}B_2D_5$                              |
|----------------------|--------------------------------------------|--------------------------------------------|--------------------------------------------|
| mode (symmetry)      | $\nu / \text{cm}^{-1}$ (int.) <sup>a</sup> | $\nu / \text{cm}^{-1}$ (int.) <sup>a</sup> | $\nu / \text{cm}^{-1}$ (int.) <sup>a</sup> |
| $\nu_1$ ( $A_1$ )    | 2529.4 (4.3)                               | 2532.3 (7.3)                               | 1828.3 (4.0)                               |
| $\nu_2$ ( $A_1$ )    | 1799.7 (9.5)                               | 1803.1 (9.9)                               | 1320.6 (6.9)                               |
| $\nu_3$ ( $A_1$ )    | 1115.2 (8.6)                               | 1118.6 (9.4)                               | 851.5 (3.6)                                |
| $\nu_4$ ( $A_1$ )    | 882.2 (3.8)                                | 889.9 (3.7)                                | 724.2 (2.6)                                |
| $\nu_5$ ( $A_1$ )    | 640.7 (4.1)                                | 650.1 (4.3)                                | 525.5 (2.9)                                |
| $\nu_6$ ( $A_2$ )    | 2633.7 (0)                                 | 2638.6 (19.3)                              | 1976.3 (0)                                 |
| $\nu_7$ ( $A_2$ )    | 855.0 (0)                                  | 859.2 (0)                                  | 657.0 (0)                                  |
| $\nu_8$ ( $A_2$ )    | 151.4 (0)                                  | 151.7 (0)                                  | 110.8 (0)                                  |
| $\nu_9$ ( $B_1$ )    | 2651.6 (153.0)                             | 2663.2 (134.9)                             | 1992.1 (89.0)                              |
| $\nu_{10}$ ( $B_1$ ) | 960.7 (5.1)                                | 962.0 (5.0)                                | 695.7 (2.4)                                |
| $\nu_{11}$ ( $B_1$ ) | 420.7 (2.4)                                | 420.7 (2.4)                                | 297.9 (1.2)                                |
| $\nu_{12}$ ( $B_2$ ) | 2517.5 (82.4)                              | 2519.2 (81.6)                              | 1811.0 (63.4)                              |
| $\nu_{13}$ ( $B_2$ ) | 1656.4 (392.2)                             | 1657.8 (395.0)                             | 1192.4 (224.4)                             |
| $\nu_{14}$ ( $B_2$ ) | 1080.3 (103.1)                             | 1083.7 (102.0)                             | 810.4 (47.8)                               |
| $\nu_{15}$ ( $B_2$ ) | 766.3 (5.3)                                | 772.2 (5.3)                                | 622.0 (2.6)                                |

<sup>a</sup>Enthalpy of formation and vibrational wavenumbers, scaled by 0.967, calculated with program Gaussian 09, B3LYP method and basis set 6-311++G\*\* (B3LYP/6-311++G\*\*); calculated intensities have unit  $\text{km mol}^{-1}$ .

6(h)  $B_2H_5$  ( $C_s$ ),  $\Delta H_f = 259.8 \text{ kJ mol}^{-1}$

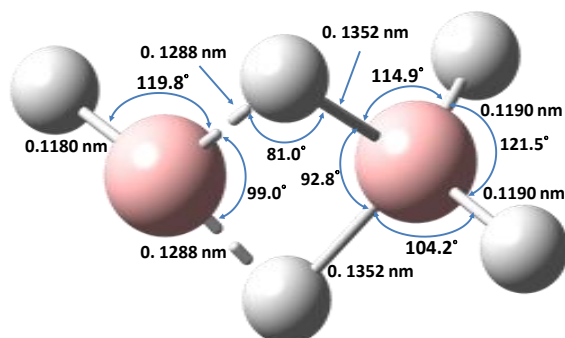

|                  | $^{11}B_2H_5$          | $^{10}B^{11}BH_5$      | $^{11}B^{10}BH_5$      | $^{11}B_2D_5$          |
|------------------|------------------------|------------------------|------------------------|------------------------|
| mode             | $\nu / \text{cm}^{-1}$ | $\nu / \text{cm}^{-1}$ | $\nu / \text{cm}^{-1}$ | $\nu / \text{cm}^{-1}$ |
| (symmetry)       | (int.) <sup>a</sup>    | (int.) <sup>a</sup>    | (int.) <sup>a</sup>    | (int.) <sup>a</sup>    |
| $\nu_1$ (A')     | 2612.9 (69.1)          | 2624.5 (68.2)          | 2613.3 (79.5)          | 1936.0 (63.7)          |
| $\nu_2$ (A')     | 2584.6 (61.3)          | 2584.7 (64.4)          | 2599.2 (51.3)          | 1933.1 (13.2)          |
| $\nu_3$ (A')     | 2493.0 (71.4)          | 2493.0 (71.2)          | 2498.5 (74.2)          | 1803.8 (50.6)          |
| $\nu_4$ (A')     | 2139.4 (20.1)          | 2140.4 (20.2)          | 2139.5 (20)            | 1521.0 (10.7)          |
| $\nu_5$ (A')     | 1437.4 (212.8)         | 1439.9 (212.5)         | 1439.4 (215.9)         | 1047.7 (119.5)         |
| $\nu_6$ (A')     | 1133.8 (38.5)          | 1133.9 (38.2)          | 1139.7 (37.8)          | 864.8 (13.4)           |
| $\nu_7$ (A')     | 882.9 (1.5)            | 888.2 (1.1)            | 891.8 (1.5)            | 755.0 (0.9)            |
| $\nu_8$ (A')     | 836.4 (3.9)            | 848.6 (4.6)            | 850.6 (3.3)            | 685.4 (2.1)            |
| $\nu_9$ (A')     | 635.3 (0.2)            | 642.5 (0.3)            | 636.3 (0.3)            | 488.1 (0.5)            |
| $\nu_{10}$ (A')  | 397.5 (20.3)           | 398.4 (20.4)           | 397.9 (20.4)           | 286.7 (10.8)           |
| $\nu_{11}$ (A'') | 2035.3 (0.1)           | 2042.5 (0.1)           | 2037.0 (0.1)           | 1502.5 (0.1)           |
| $\nu_{12}$ (A'') | 1590.3 (0.6)           | 1590.4 (0.6)           | 1593.8 (0.6)           | 1152.3 (0.8)           |
| $\nu_{13}$ (A'') | 937.2 (11.1)           | 937.2 (11.1)           | 944.7 (11.3)           | 718.6 (6.4)            |
| $\nu_{14}$ (A'') | 816.8 (0.2)            | 817.6 (0.2)            | 816.9 (0.3)            | 615.0 (0.3)            |
| $\nu_{15}$ (A'') | 803.8 (0)              | 808.6 (0)              | 806.6 (0)              | 577.3 (0.1)            |

<sup>a</sup>Enthalpy of formation and vibrational wavenumbers, scaled by 0.967, calculated with program Gaussian 09, B3LYP method and basis set 6-311++G\*\* (B3LYP/6-311++G\*\*); calculated intensities have unit  $\text{km mol}^{-1}$ .



6(i)  $B_2H_6$  ( $D_{2h}$ ),  $\Delta H_f = 50.1 \text{ kJ mol}^{-1}$

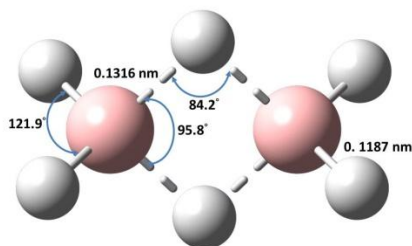

|                         | $^{11}B_2H_6$                                 | $^{10}B^{11}BH_6$                             | $^{11}B_2D_6$                                 |
|-------------------------|-----------------------------------------------|-----------------------------------------------|-----------------------------------------------|
| mode<br>(symmetry)      | $\nu / \text{cm}^{-1}$<br>(int.) <sup>a</sup> | $\nu / \text{cm}^{-1}$<br>(int.) <sup>a</sup> | $\nu / \text{cm}^{-1}$<br>(int.) <sup>a</sup> |
| $\nu_1$ ( $A_g$ )       | 2524.2 (0)                                    | 2527.7 (6.1)                                  | 1833.1 (0)                                    |
| $\nu_2$ ( $A_g$ )       | 2094.9 (0)                                    | 2095.3 (0)                                    | 1487.4 (0)                                    |
| $\nu_3$ ( $A_g$ )       | 1160.0 (0)                                    | 1163.7 (7.1)                                  | 885.6 (0)                                     |
| $\nu_4$ ( $A_g$ )       | 770.6 (0)                                     | 786.4 (0)                                     | 692.9 (0)                                     |
| $\nu_5$ ( $A_u$ )       | 820.7 (0)                                     | 820.7 (0)                                     | 580.6 (0)                                     |
| $\nu_6$ ( $B_{1g}$ )    | 2595.9 (0)                                    | 2600.3 (28.4)                                 | 1946.3 (0)                                    |
| $\nu_7$ ( $B_{1g}$ )    | 905.3 (0)                                     | 910.5 (0)                                     | 721.9 (0)                                     |
| $\nu_8$ ( $B_{1u}$ )    | 1915.0 (8.8)                                  | 1920.4 (9.0)                                  | 1430.4 (6.7)                                  |
| $\nu_9$ ( $B_{1u}$ )    | 958.6 (16.6)                                  | 961.2 (16.6)                                  | 707.9 (8.6)                                   |
| $\nu_{10}$ ( $B_{2g}$ ) | 1784.8 (0)                                    | 1785.9 (0)                                    | 1280.6 (0)                                    |
| $\nu_{11}$ ( $B_{2g}$ ) | 863.6 (0)                                     | 870.8 (0)                                     | 707.2 (0)                                     |
| $\nu_{12}$ ( $B_{2u}$ ) | 2610.6 (185.5)                                | 2621.6 (158.3)                                | 1954.2 (104.1)                                |
| $\nu_{13}$ ( $B_{2u}$ ) | 917.2 (0.2)                                   | 921.0 (0.2)                                   | 675.6 (0)                                     |
| $\nu_{14}$ ( $B_{2u}$ ) | 346.6 (16.4)                                  | 346.6 (16.4)                                  | 245.3 (8.2)                                   |
| $\nu_{15}$ ( $B_{3g}$ ) | 989.6 (0)                                     | 989.6 (0)                                     | 700.0 (0)                                     |
| $\nu_{16}$ ( $B_{3u}$ ) | 2511.0 (148.8)                                | 2513.0 (146.1)                                | 1813.2 (113.9)                                |
| $\nu_{17}$ ( $B_{3u}$ ) | 1645.6 (472.0)                                | 1648.1 (475.5)                                | 1199.8 (266.6)                                |
| $\nu_{18}$ ( $B_{3u}$ ) | 1151.2 (76.7)                                 | 1153.6 (68.3)                                 | 853.2 (26.1)                                  |

<sup>a</sup>Enthalpy of formation and vibrational wavenumbers, scaled by 0.967, calculated with program Gaussian 09, B3LYP method and basis set 6-311++G\*\* (B3LYP/6-311++G\*\*); calculated intensities have unit  $\text{km mol}^{-1}$ .

**7. Wavenumber/cm<sup>-1</sup> and intensity/km mol<sup>-1</sup> of calculated fundamental vibrational modes for various isotopic B<sub>2</sub>H<sub>4</sub><sup>+</sup> (C<sub>2v</sub>) and B<sub>2</sub>D<sub>4</sub><sup>+</sup> (C<sub>2v</sub>)**

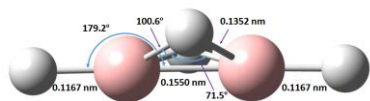

**Table S7.** Wavenumber/cm<sup>-1</sup> and intensity/km mol<sup>-1</sup> of calculated fundamental vibrational modes for various isotopic B<sub>2</sub>H<sub>4</sub><sup>+</sup> (C<sub>2v</sub>) and B<sub>2</sub>D<sub>4</sub><sup>+</sup> (C<sub>2v</sub>)

| mode(sym)                         | <sup>11</sup> B <sub>2</sub> H <sub>4</sub> <sup>+</sup> |                          | <sup>11</sup> B <sup>10</sup> BH <sub>4</sub> <sup>+</sup> |                          | <sup>10</sup> B <sub>2</sub> H <sub>4</sub> <sup>+</sup> |                          |
|-----------------------------------|----------------------------------------------------------|--------------------------|------------------------------------------------------------|--------------------------|----------------------------------------------------------|--------------------------|
|                                   | calc. cm <sup>-1</sup> (int.) <sup>a</sup>               | calc. cm <sup>-1 b</sup> | calc. cm <sup>-1</sup> (int.) <sup>a</sup>                 | calc. cm <sup>-1 b</sup> | calc. cm <sup>-1</sup> (int.) <sup>a</sup>               | calc. cm <sup>-1 b</sup> |
| v <sub>1</sub> (A <sub>1</sub> )  | 2773.8 (0)                                               | 2767.2                   | 2784.3 (0.91)                                              | 2776.6                   | 2784.3 (0.91)                                            | 2785.6                   |
| v <sub>2</sub> (A <sub>1</sub> )  | 2050.7 (4.45)                                            | 2000.3                   | 2051.2 (4.37)                                              | 2002.3                   | 2051.2 (4.37)                                            | 2013.6                   |
| v <sub>3</sub> (A <sub>1</sub> )  | 1112.8 (0.35)                                            | 1130.2                   | 1135.6 (0.42)                                              | 1134.9                   | 1158.2 (0.49)                                            | 1156.3                   |
| v <sub>4</sub> (A <sub>1</sub> )  | 739.6 (6.41)                                             | 658.6                    | 742.1 (5.86)                                               | 660.8                    | 744.5 (5.35)                                             | 662.9                    |
| v <sub>5</sub> (A <sub>1</sub> )  | 540.7 (9.77)                                             | 558.8                    | 541.2 (10.16)                                              | 551.8                    | 541.6 (10.49)                                            | 551.8                    |
| v <sub>6</sub> (A <sub>2</sub> )  | 1545.2 (0)                                               | 1475.4                   | 1547.0 (0.01)                                              | 1478.1                   | 1548.8 (0)                                               | 1480.7                   |
| v <sub>7</sub> (A <sub>2</sub> )  | 687.0 (0)                                                | 699.8                    | 693.2 (0.01)                                               | 706.0                    | 699.6 (0)                                                | 712.4                    |
| v <sub>8</sub> (B <sub>1</sub> )  | 2098.1 (16.79)                                           | 2165.2                   | 2102.7 (16.12)                                             | 2171.5                   | 2107.4 (15.47)                                           | 2178.2                   |
| v <sub>9</sub> (B <sub>1</sub> )  | 758.4 ( 5.72)                                            | 782.7                    | 759.6 (6.09)                                               | 783.9                    | 760.7 (6.43)                                             | 784.9                    |
| v <sub>10</sub> (B <sub>2</sub> ) | 2744.1 (29.18 )                                          | 2731.6                   | 2748.6 (26.91)                                             | 2736.9                   | 2756.1 (26.46)                                           | 2743.0                   |
| v <sub>11</sub> (B <sub>2</sub> ) | 1398.9 (124.19)                                          | 1315.4                   | 1401.5 (126.55)                                            | 1317.8                   | 1403.7 (128.78)                                          | 1319.7                   |
| v <sub>12</sub> (B <sub>2</sub> ) | 489.2 (2.76)                                             | 639.8                    | 493.5 (2.86)                                               | 646.2                    | 498.0 (2.94)                                             | 653.1                    |
| mode(sym.)                        | <sup>11</sup> B <sub>2</sub> D <sub>4</sub> <sup>+</sup> |                          | <sup>11</sup> B <sup>10</sup> BD <sub>4</sub> <sup>+</sup> |                          | <sup>10</sup> B <sub>2</sub> D <sub>4</sub> <sup>+</sup> |                          |
|                                   | calc. cm <sup>-1</sup> (int.) <sup>a</sup>               | calc. cm <sup>-1 b</sup> | calc. cm <sup>-1</sup> (int.) <sup>a</sup>                 | calc. cm <sup>-1 b</sup> | calc. cm <sup>-1</sup> (int.) <sup>a</sup>               | calc. cm <sup>-1 b</sup> |
| v <sub>1</sub> (A <sub>1</sub> )  | 2103.8 (0.07)                                            | 2136.4                   | 2121.0 (0.09)                                              | 2161.8                   | 2135.3 (0.11)                                            | 2162.0                   |
| v <sub>2</sub> (A <sub>1</sub> )  | 1457.8 (1.45)                                            | 1436.9                   | 1458.6 (1.38)                                              | 1439.6                   | 1459.3 (1.30)                                            | 1441.5                   |
| v <sub>3</sub> (A <sub>1</sub> )  | 1031.2 (0.77)                                            | 1045.3                   | 1049.5 (6.54)                                              | 1067.3                   | 1064.3 (0.86)                                            | 1067.6                   |
| v <sub>4</sub> (A <sub>1</sub> )  | 556.0 (0.10)                                             | 518.6                    | 559.3 (0.03)                                               | 521.9                    | 562.3 (0)                                                | 524.6                    |
| v <sub>5</sub> (A <sub>1</sub> )  | 387.3 (8.18)                                             | 394.1                    | 387.6 ( 8.37 )                                             | 394.6                    | 388.0 (8.74)                                             | 394.5                    |
| v <sub>6</sub> (A <sub>2</sub> )  | 1120.5 (0)                                               | 1061.9                   | 1123.4 (0.01)                                              | 1067.8                   | 1126.5 (0)                                               | 1070.4                   |
| v <sub>7</sub> (A <sub>2</sub> )  | 565.2 (0)                                                | 577.6                    | 572.3 (0.31)                                               | 585.0                    | 578.6 (0)                                                | 591.3                    |
| v <sub>8</sub> (B <sub>1</sub> )  | 1549.3 (3.14)                                            | 1488.5                   | 1555.7 (2.77)                                              | 1495.2                   | 1562.0 (2.43)                                            | 1503.3                   |
| v <sub>9</sub> (B <sub>1</sub> )  | 550.8 (6.77)                                             | 568.3                    | 551.6 (6.90)                                               | 569.1                    | 553.3 (7.60)                                             | 570.8                    |
| v <sub>10</sub> (B <sub>2</sub> ) | 2026.3 (4.21)                                            | 2035.0                   | 2033.3 (3.59)                                              | 2042.0                   | 2043.2 (2.93)                                            | 2051.1                   |
| v <sub>11</sub> (B <sub>2</sub> ) | 1020.2 (84.0)                                            | 985.3                    | 1021.3 (80.3)                                              | 988.7                    | 1025.5 (88.0)                                            | 990.8                    |

<sup>a</sup> These wavenumbers/cm<sup>-1</sup>, scaled by 0.967, and intensities/km mol<sup>-1</sup> within parentheses were calculated in an harmonic approximation.

<sup>b</sup> These wavenumbers/cm<sup>-1</sup> were calculated in an anharmonic approximation.

**8. Wavenumber/cm<sup>-1</sup> and intensity/km mol<sup>-1</sup> of calculated fundamental vibrational modes and NIST data for <sup>11</sup>B<sub>2</sub>H<sub>6</sub>**

**Table S8.** Wavenumber/cm<sup>-1</sup> and intensity/km mol<sup>-1</sup> of calculated fundamental vibrational modes and NIST data for <sup>11</sup>B<sub>2</sub>H<sub>6</sub>

| mode (symmetry)                    | type of mode          | data from NIST <sup>a</sup> | calc. v (int.) <sup>b</sup> |
|------------------------------------|-----------------------|-----------------------------|-----------------------------|
| v <sub>1</sub> (A <sub>g</sub> )   | BH <sub>2</sub> s-str | 2524                        | 2524.2 ( 0 )                |
| v <sub>2</sub> (A <sub>g</sub> )   | ring str              | 2104                        | 2094.9 ( 0 )                |
| v <sub>3</sub> (A <sub>g</sub> )   | BH <sub>2</sub> sciss | 1180                        | 1160.0 ( 0 )                |
| v <sub>4</sub> (A <sub>g</sub> )   | ring deform           | 794                         | 770.6 ( 0 )                 |
| v <sub>5</sub> (A <sub>u</sub> )   | BH <sub>2</sub> twist | 833                         | 820.7 ( 0 )                 |
| v <sub>10</sub> (B <sub>1g</sub> ) | ring str              | 1768                        | 1784.8 ( 0 )                |
| v <sub>11</sub> (B <sub>1g</sub> ) | BH <sub>2</sub> wag   | 850                         | 863.6 ( 0 )                 |
| v <sub>12</sub> (B <sub>1u</sub> ) | BH <sub>2</sub> a-str | 2612                        | 2610.6 ( 185.5 )            |
| v <sub>13</sub> (B <sub>1u</sub> ) | BH <sub>2</sub> rock  | 950                         | 917.2 ( 0.2 )               |
| v <sub>14</sub> (B <sub>1u</sub> ) | ring pucker           | 368                         | 346.6 ( 16.4 )              |
| v <sub>6</sub> (B <sub>2g</sub> )  | BH <sub>2</sub> a-str | 2591                        | 2595.9 ( 0 )                |
| v <sub>7</sub> (B <sub>2g</sub> )  | BH <sub>2</sub> rock  | 915                         | 905.3 ( 0 )                 |
| v <sub>8</sub> (B <sub>2u</sub> )  | ring str              | 1915                        | 1915.0 ( 8.8 )              |
| v <sub>9</sub> (B <sub>2u</sub> )  | BH <sub>2</sub> wag   | 973                         | 958.6 ( 16.6 )              |
| v <sub>15</sub> (B <sub>3g</sub> ) | BH <sub>2</sub> twist | 1012                        | 989.6 ( 0 )                 |
| v <sub>16</sub> (B <sub>3u</sub> ) | BH <sub>2</sub> s-str | 2525                        | 2511.0 ( 148.8 )            |
| v <sub>17</sub> (B <sub>3u</sub> ) | ring deform           | 1602                        | 1645.6 ( 472.0 )            |
| v <sub>18</sub> (B <sub>3u</sub> ) | BH <sub>2</sub> sciss | 1177                        | 1151.2 ( 76.7 )             |

<sup>a</sup> data from NIST Chemistry WebBook at <http://webbook.nist.gov/chemistry/>

<sup>b</sup>Vibrational wavenumbers (unit cm<sup>-1</sup>), scaled by 0.967, calculated with program Gaussian 09, B3LYP method and basis set 6-311++G\*\* (B3LYP/6-311++G\*\*); calculated intensities have unit km mol<sup>-1</sup>.
